# Supplementary material
Source: MDPI journal article supplement (https://www.mdpi.com/2227-9717/12/2/258)
Supplement: s1 [file s1]

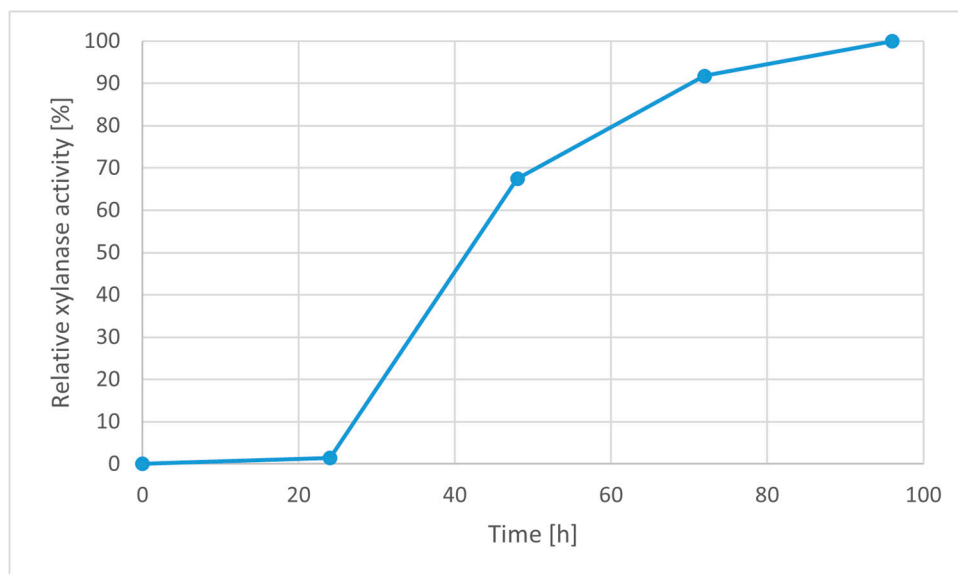

Figure S1. Relative xylanase activities [%] obtained from fermentation by using *C. phragmiteti* in LB medium containing 1 *w/w*% of dry matter waste paper as a function of fermentation time. Average values of relative xylanase activity are presented with error bars representing the standard deviations of triplicates.

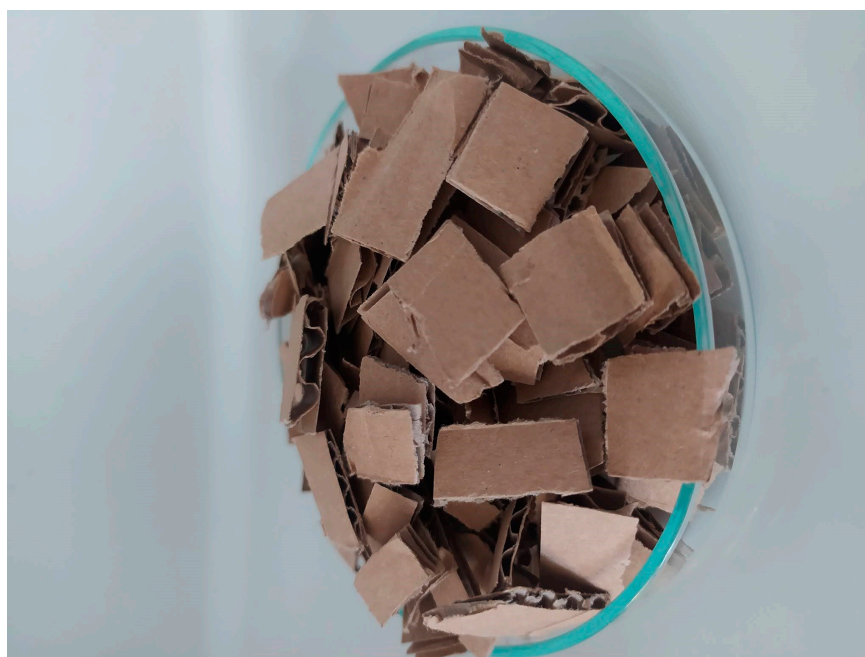

Figure S2. Appearance of the waste paper used in the experiments.
